# Supplementary material for: Artificial intelligence approaches to the volumetric quantification of glycogen granules in EM images of human tissue
Source: PubMed Central journal article supplement (PMC11233403; doi:10.1085/jgp.202413595), 2024-07-09
Supplement: JGP_202413595_DataS3.pdf [file JGP_202413595_DataS3.pdf]

A module that corrects minor errors in the volumes generated by voxel1.pro.

```
pro restore_vol_granules
; corrects minor errors in volume produced by voxel1
side=400 & sidez=200 & ngrans=3000
line = fltarr(6) & gsites=fltarr(ngrans,6)
outname='D:\Dropbox\Methods Manuscript Revision\gran_centers_radii_400_3000.txt'
dir='D:\Dropbox\Methods Manuscript Revision\'
side=400 & sidez=200 & ngrans=3000
openr,om,outname,/get_lun
for i=0,ngrans-1 do begin
    readf,om,line
    gsites(i,*)=line
endfor
close,om & free_lun,om
;actual restoration of granules in volume vil
vil=bytarr(400,400,200)
s = size(vil)
scale3, X RANGE=[0, S[1]], Y RANGE=[0, S[2]], Z RANGE=[0, S[3]] ;scale3 module, enables later display of volume
for i=0,2999 do begin
    x=gsites(i,1) & y=gsites(i,2) & z=gsites(i,3) & r=gsites(i,4)
    nel=[27,93,251,484,895,1365,2100,2900,4000]
    nelements=nel(r-2) ; nelements will be used to check granule completion
    voxelcount=0
    for j=0,399 do begin
        for k=0,399 do begin
            for l=0,199 do begin
                if ((x-j)^2 + (y-k)^2 + (z-l)^2) lt r^2 then begin
                    vil(j,k,l)=255
                    voxelcount = voxelcount + 1
                endif
                if voxelcount eq nelements then goto,jump_gran_completed
            endfor
        endfor
    endfor
    jump_gran_completed:
    wait, 0.1
    print, 'restored granule ',i
    if ((i Mod 400 eq 0) and (i ne 0)) then begin ; will save vol at grans count 400 and multiples
        nameu= dir + 'vil_'+strcompress(s(1),/remove_all)+'_'+strcompress(i,/remove_all)+'grans.u'
        openw,um,nameu,/get_lun
        writeu,um,vil
        close,um & free_lun,um
    endif
endfor
thresh=254 & shade_volume, vil, thresh, v, p
window,0, xsize=700, ysize=400 & tv,polyshade(v,p,/T3D)
window,1, xpos = 0, ypos=0, xsize=side, ysize=side & tv,vil(*,*,100)
nameu= dir + 'vil_'+strcompress(s(1),/remove_all)+'_'+strcompress(i,/remove_all)+'grans.u'
openw,um,nameu,/get_lun
writeu,um,vil ;saves the volume with maximal count of granules.
close,um & free_lun,um
stop
end
```

Program to detect and measure granules in label masks. For convenience of presentation, the code is displayed as 3 separate images.

```
pro g2_xy_granules_full_folder
; produces list of granule parameters, from label images
; assumes pixel distances of 0.8 nm, but all that can be changed
; all png files in folder are processed.
; All granule parameters are output on same line, with number of image and granule
; this program also produces images with event contour and long axis,
; see Brum et al. J. Physiol. 2000, for examples
; it uses as input label files .png..
; adapted to detect segmentation labels of granules, has very simple criteria for event detection

device, get_decomposed=olddc      ; to work with TRUE color
device, decomposed=0
dummy=' '
storage= 'C:\Users\erios\EM_Images\split_granules_Montse_Penn_train_labels\'
; where input label files will be located. May change if necessary.
dir1= 'C:\Users\erios\EM_Images\split_granules_Montse_Penn_train\' ; where input files will be located.
dir='D:\Dropbox\Methods Manuscript Revision\'
table=3; contrast=0.0
xlen=1024 & xfst=1 & nx=1024      ; file dimensions, change if necessary.
ylen=1024 & ny=1024
loadct, table & tvlct, r, g, b, /get&r(0)=0 & g(0)=255
r(221)=255& g(221)=0 & b(221)=0
r(220)=0 & g(220)=0 & b(220)=0
r(219)=0 & g(219)=0 & b(219)=255
window, 3, xs=xlen/2, ys=ylen/2, xpos=0, ypos=0
dummy=' ' & fname=' ' & dummies=' ' & outname=' '
dx = 0.8 & dy = dx & tscan =dy & dt =dx
cri=1.
cris=200
; input file block *****
unity=fltarr(xlen,ylen)+1.
n_pixel=50 ; minimum pixel size, a criterion for exclusion
filelist=file_search(storage, '*.png')
n=n_elements(filelist)
print, 'n = ', n
tcount=0 ; total counter of events
pro_sk=(fltarr(50000,9)) ; for output list
for k=0,n-1 do begin ; loop over images
print, 'k = ', strcompress(k)
infile=filelist((k))
ima=read_png(infile) & ima=long(ima)
inac=rebin2(ima)
npx=xlen & ny=ylen & npy=ny & wid=npy & init=0 & fin=xlen-1
xmin=0 & xmax=xlen-1 & nl=0 & nml=ylen-1 & area=npx*npy*dx*dx
; true area, even though calculated in compressed image
yf2=ima
jump_defmask:
mask=ima ;el ;minates all prior filtering
loadct, table
im= ima
siim=1010
in(sii:nx-1, siim:ny-1)=0 ; no starting beyond 1010
ime=ima
mask=ima ; Array to hold final event masks
imo=ima*0+220 ; imo will be used to display event contours and axes
```

Continues on next page

```

d=ima(where (im eq 0))                ;(imf eq 0))
mean=0
sq=fltarr(1)
skc=0                                ;initialize event counter
While (total(im) ne 0) do begin
;print,'total im = ',total(im)
abt=min(where(im eq 1)) & tt=abt/npx & xx=abt mod npx ;initial position of event region
;define search area
nnk=fix(min([37, xx]))                ;starts 4 microns from edge
if npx-xx lt 37 then nnk=73-(npx-xx)
nnr=fix(max([72-xx, 72-nnk]))        ;i changed from 0 to 2 the condition
mmb=fix(min([37, tt]))
if npy-tt lt 37 then mmb=73-(npy-tt)
mme=fix(max([72-tt, 72-mmb]))
ym=lonarr(mmb+mme+1, mmb+mme+1)      ;array to hold growing points
ym(36,36)=1                          ;initial seeding for growth
sk=ym                                  ;array to hold the spark as seen in the mask image
for iii=0,500 do begin                ;surface growth generation count
yt=sk                                  ;potential new surface points
nend=1
jump_enlarge:
nend=nend+1
yn=(ime(xx-nnk:xx+nnr,tt-mmb:tt+mme)) and long(smooth(double(ym),3,edge=1)*100.<1)
; dilation of ym by 3*3 filter
if total(yn) eq 0 and iii eq 0 then begin
for w=0,nend do for v=0,nend do ym(0 > nnk+w < 72,0 > mmb+v < 72)=1
goto, jump_enlarge
endif
if total (yn) eq 0 then goto, jump2
sk=sk>yn                               ;update sk
ime(xx-nnk:xx+nnr,tt-mmb:(tt+mme))=ime(xx-nnk:xx+nnr,tt-mmb:(tt+mme))-fix(sk)>0
;excise the points that already included in the cluster
im(xx-nnk:xx+nnr,tt-mmb:(tt+mme))=im(xx-nnk:xx+nnr,tt-mmb:(tt+mme))-fix(sk)>0
ym=yn-long(yt)>0                       ;true new surface growth point
if iii eq 500 then print,'WARNING: event SEARCH AREA MAY BE TOO SMALL'
endifor
jump2: sd=sd
s_mass=total((ima(xx-nnk:xx+nnr,tt-mmb:(tt+mme)<siim-1)-mean)*sk) ; calculation of signal mass
sizsk=size(sk)
sq= s_mass/(sd*sqrt(total(sk)))
if total(sk) eq 1 then begin
im(xx,tt)=0
mask(xx,tt)=0
goto, jump3
endif
if total(sk) le m_pixel then mask(xx-nnk:xx+nnr,tt-mmb:(tt+mme)$
<siim-1)=mask(xx-nnk:xx+nnr,tt-mmb:(tt+mme)<siim-1)*(1-sk) ; remove the unlikely events in the mask
if total(sk) le m_pixel then goto, jump3 ;discard if the false rate > 0.1 per 768*206 image
if s_mass/total(sk) le cri*m_pixel/cri$ then begin
mask(xx-nnk:xx+nnr,tt-mmb:(tt+mme)<siim-1)=mask(xx-nnk:xx+nnr,tt-mmb:(tt+mme)<siim-1)*(1-sk)
; remove the unlikely events in the mask
goto, jump3
endif
ars=rebin(float(sk),nnk+nnr+1,1) & ars=where(ars ne 0)

```

Continues on next page

```

ax=max(ars) & bx=min(ars)
ars=rebin(float(sk),1,(size(sk))(2)) & ars=where(ars ne 0)
at=max(ars) & bt=min(ars)
ux=xx-nnk & ut=tt-mmb
bb=size(sk) & c=size(yf2) & npx=c(1)
am=rebin(float(sk),bb(1),1) & am=where(am ne 0)
ax=max(am) & bx=min(am) ; ax,bx: left and right edges of event within mask
widthx=dx*(ax-bx)
am=rebin(float(sk),1,bb(2)) & am=where(am ne 0)
at=max(am) & bt=min(am) ; at,bt: initiation and end time of event within mask
widthy=dx*(at-bt)
areask=dx*dx*n_elements(where(sk gt 0))
cim=ima(ux:ux+bb(1)-1,ut:ut+bb(2)-1) ; cim is filtered image within mask
tim=yf2(ux:ux+bb(1)-1,ut:ut+bb(2)-1) ; tim, normalized image within mask
skc=skc + 1 ; event counter incremented
tcount=tcount + 1 & if tcount Mod 50 eq 0 then print, 'spark total #:',tcount
;work with contour
sk1=sk*0 & sk1(*,0)=1 & sk1(bb(1)-1,*)=1 & sk1(*,bb(2)-1)=1 & sk1(0,*)=1
ss=(shift(sk,1,0)+shift(sk,-1,0)+shift(sk,0,1)+shift(sk,0,-1))<1-sk
border=where(ss ne 0)
posi=bytarr(n_elements(border),2)
np=n_elements(border)
for i=0,np-1 do posi(i,0)=border(i) Mod bb(1) ; x array index within sk
for i=0,np-1 do posi(i,1)=border(i)/bb(1) ; y array index within sk
minx=min(posi(*,0)) & maxx=max(posi(*,0)) & mint=min(posi(*,1)) & maxt=max(posi(*,1))
pos=posi*dx
dis=fltarr(np,np)
for i=0,np-1 do for jj=0,np-1 do dis(i,jj)=sqrt((pos(i,0)-pos(jj,0))^2+(pos(i,1)-pos(jj,1))^2)
length=max(dis)
whemax=where(dis eq length)
stop
imax=whemax mod np & ifst=imax(0)<imax(n_elements(imax)-1) & ilst =imax(0)>imax(n_elements(imax)-1)
gx=ux+ total(cim(where(sk ne 0)) * (where(sk ne 0) mod bb(1)))/total(cim(where(sk ne 0)))
gy=ut+ total(cim(where(sk ne 0)) * ((where(sk ne 0)/bb(1))))/total(cim(where(sk ne 0)))
;center of gravity within ROI
whemax=where(tim*sk eq max(tim*sk)) & whemax=whemax(0)
maxsk=fix(whemax/bb(1)) ; t position of maximum within mask
mask2=mask
for v=-3,3 do for w=-3,3 do mask2(0 > gx+w < 1023,0 > gy+w < 1023)=-1
tvsc1_rebin(mask2,512,512)
;stop
pro_sk(tcount-1,0)=skc ; event number
pro_sk(tcount-1,1)=round(gx)
pro_sk(tcount-1,2)=round(gy) ; center of gravity within ROI
pro_sk(tcount-1,3)=length
pro_sk(tcount-1,4)=widthx
pro_sk(tcount-1,5)=widthy
pro_sk(tcount-1,6)=areask
pro_sk(tcount-1,7)=k
pro_sk(tcount-1,8)=tcount
jump3: sd=sd
endwhile
jump5: ;orderly exit
if skc le 0 then goto,jump4
jump4: sd=sd ;go to another image
cnt=(shift(mask,-1,0)+shift(mask,1,0)+shift(mask,0,1)+shift(mask,0,-1))<1-mask>0 ;contour of all sparks
cntc=rebin(cnt*10,xlen/2,ylen/2)
tv,100+cntc*200<255 ; contour of all events
;stop ;use the following to display original image
;fileimage= dir1+strmid(filelist(k),65,4) +'.png' & image= read_png(fileimage)
;tvsc1_rebin2(image) ;tvsc1_rebin2(mask2)
jump04:
endfor
pro_sk=pro_sk(0:tcount-1,*)
tava=transpose(pro_sk)
outnamo = strmid(filelist(k-1),0,74)+'_all.txt' ; ascii output with event parameters
openw_un,outnamo,/get_lun
printf_un,'gran # gx gy length width x width y n_pixel image#'
printf_un,format='(3I8,4f8.1,2I8)',tava
close_un & free_lun_un
stop
device, decomposed=olddc
END

```
